# Supplementary material for: FTIR imaging of structural changes in visceral and subcutaneous adiposity and brown to white adipocyte transdifferentiation
Source: Royal Society of Chemistry journal article supplement (doi:10.1039/c4an02008a), 2015-01-01
Supplement: c4an02008a1.pdf [file c4an02008a1.pdf]

**Table 1S.** The wavenumber limits and baseline points used for particular infrared bands.

| <b>Infrared band</b>                     | <b>Integrated spectral (cm<sup>-1</sup>)</b> | <b>Baseline points (cm<sup>-1</sup>)</b> |
|------------------------------------------|----------------------------------------------|------------------------------------------|
| Olefinic=CH                              | 3020-2992                                    | 3100-2740                                |
| CH <sub>3</sub> antisymmetric stretching | 2976-2948                                    | 3100-2740                                |
| CH <sub>2</sub> antisymmetric stretching | 2940-2916                                    | 3100-2740                                |
| CH <sub>3</sub> symmetric stretching     | 2880-2864                                    | 3100-2740                                |
| CH <sub>2</sub> symmetric stretching     | 2864-2844                                    | 3100-2740                                |
| C-H region                               | 2980-2830                                    | 3100-2740                                |
| Carbonyl (C = O) stretching              | 1764-1724                                    | 1850-1500                                |
| Amide I                                  | 1672-1636                                    | 1850-1500                                |
| Amide II                                 | 1560-1536                                    | 1850-1500                                |
